# Supplementary material for: REDUCING THE EMPLOYEES' RESISTANCE: WHEN ORGANIZATIONAL CLIMATE HAS NEGATIVE CORRELATION TO JOB SATISFACTION
Source: MDPI journal article supplement (doi:10.3390/molecules28145396), 2009-01-01
Supplement: s1 [file s1]

## **SUPPORTING INFORMATION**

# **In Vitro Assessment of the Physiologically Relevant Oral Bioaccessibility of Metallic Elements in Edible Herbs Using the Unified Bioaccessibility Protocol**

Tatiana G. Choleva, Charikleia Tziasiou, Vasiliki Gouma, Athanasios Vlessidis,

Dimosthenis L. Giokas

Department of Chemistry, University of Ioannina, 45110, Ioannina, Greece

**Table S1.** Composition of the digestive fluids used in the *in-vitro* UBM bioaccessibility method. Concentrations are in g/L unless otherwise stated.

|                          |                                  | Salivary fluid | Gastric fluid | Duodenal fluid | Bile |
|--------------------------|----------------------------------|----------------|---------------|----------------|------|
| <b>Inorganic salts</b>   | KCl                              | 1.8            | 1.6           | 1.13           | 0.8  |
|                          | NaCl                             | 0.6            | 5.5           | 14.0           | 10.5 |
|                          | NH <sub>4</sub> Cl               | -              | 0.6           | -              | -    |
|                          | CaCl <sub>2</sub>                | -              | 0.8           | 0.4            | 0.4  |
|                          | MgCl <sub>2</sub>                | -              | -             | 0.1            | -    |
|                          | NaH <sub>2</sub> PO <sub>4</sub> | 1.8            | 0.5           | -              | -    |
|                          | KH <sub>2</sub> PO <sub>4</sub>  | -              | -             | 0.16           | -    |
|                          | KSCN                             | 0.4            | -             | -              | -    |
|                          | NaHCO <sub>3</sub>               | 3.4            | -             | 6.7            | 11.6 |
|                          | NaSO <sub>4</sub>                | 1.1            | -             | -              | -    |
|                          | HCl (% w/v)                      | -              | 1.3           | 0.04           | 0.03 |
| <b>Organic compounds</b> | Urea                             | 0.4            | 0.2           | 0.2            | 0.5  |
|                          | Uric acid                        | 0.03           | -             | -              | -    |
|                          | Glucose                          | -              | 1.3           | -              | -    |
|                          | Glucuronic acid                  | -              | 0.04          | -              | -    |
|                          | Glucosamine hydrochloride        | -              | 0.7           | -              | -    |
|                          |                                  |                |               |                |      |
| <b>Enzymes</b>           | $\alpha$ -Amylase                | 0.5            | -             | -              | -    |
|                          | Mucin                            | 0.05           | 6.0           | -              | -    |
|                          | BSA                              | -              | 2.0           | 2.0            | 3.6  |
|                          | Pepsine                          | -              | 5.0           | -              | -    |
|                          | Pancreatin                       | -              | -             | 18.0           | -    |
|                          | Lipase                           | -              | -             | 3.0            | -    |
|                          | Bile                             | -              | -             | -              | 6.0  |

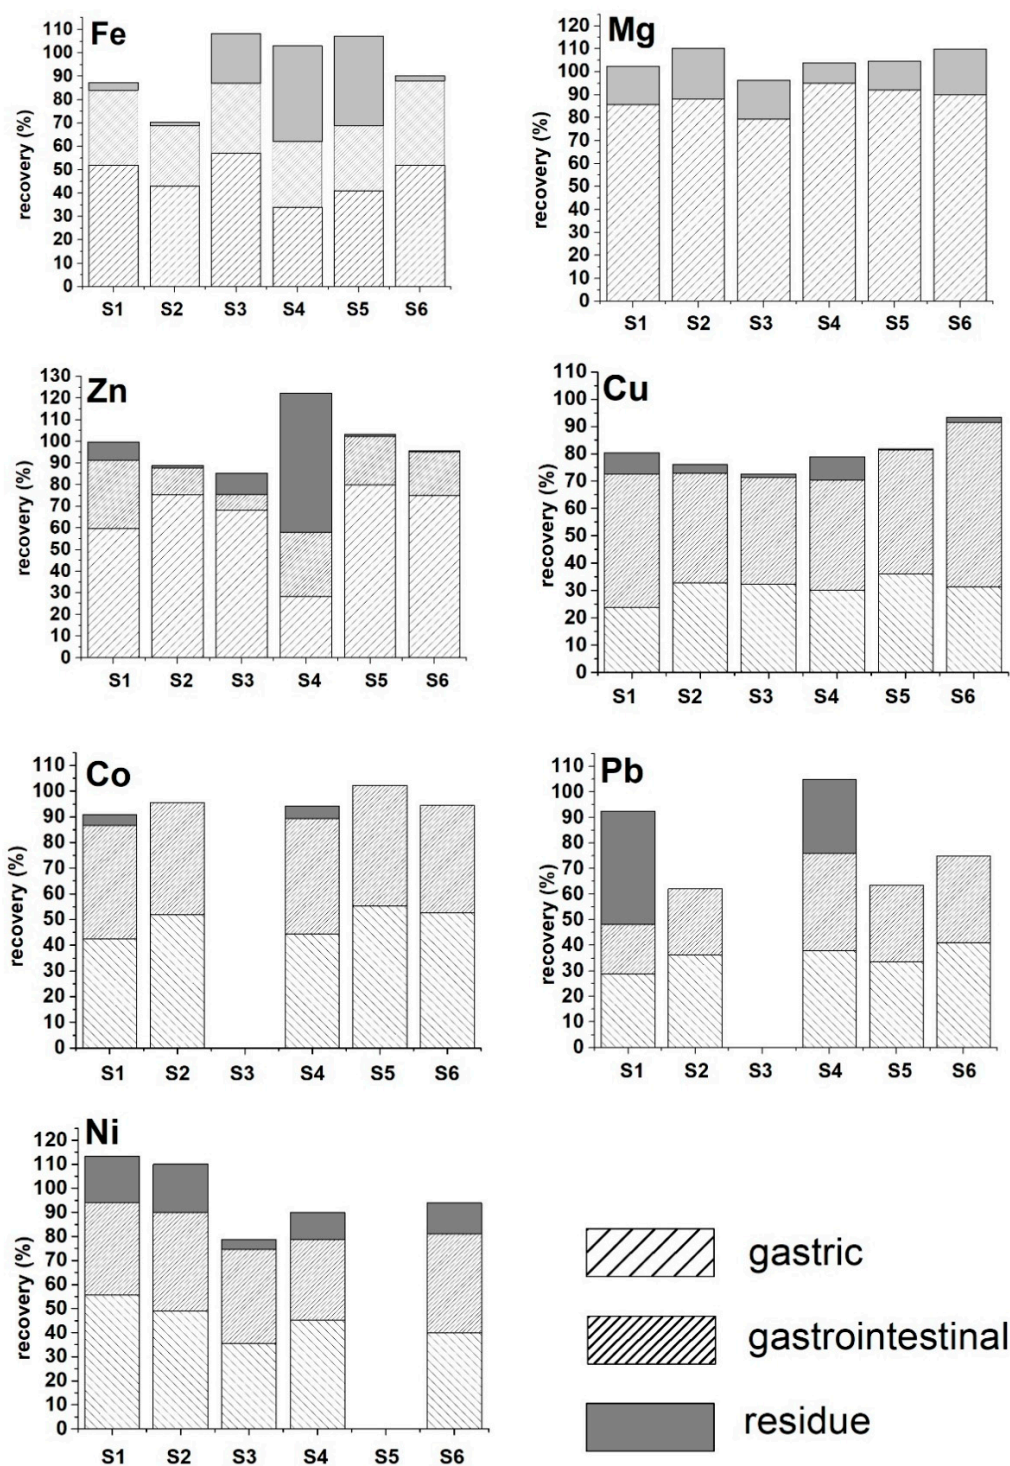

**Figure S1.** Recovery (%) of essential elements and toxic metal ions in herbs. Patterns inside the bar blots show bioaccessible fraction (BF, %) in the gastric and gastrointestinal phases and the residual amount remaining after digestion. S1: Parsley, S2: Dill, S3: Spearmint, S4: Oregano, S5: Thyme, S6: Rosemary.
